# Supplementary material for: Structural design enabled a hypotoxic Na3.36FeV(PO4)3 cathode with ultra-fast and ultra-long sodium storage
Source: Royal Society of Chemistry journal article supplement (doi:10.1039/d2nr03867f), 2022-01-01
Supplement: d2nr03867f1.pdf [file d2nr03867f1.pdf]

## Supporting Information

### **Structural Design Enabled a Hypotoxic $\text{Na}_{3.36}\text{FeV}(\text{PO}_4)_3$ Cathode With Ultra-fast and Ultra-long Sodium Storage**

Li-Ming Zhang<sup>a</sup>, Kuo Cao<sup>a</sup>, Shuo Wang<sup>a</sup>, Fei Chen<sup>a</sup>, Jie-Min Dong<sup>a</sup>, Nai-Qing Ren<sup>a</sup>,  
Yi-Xuan Li<sup>a</sup>, Zhao-Yin Wen<sup>b</sup>, Chun-Hua Chen<sup>a,\*</sup>

<sup>a</sup>CAS Key Laboratory of Materials for Energy Conversions, Department of Materials  
Science and Engineering & Collaborative Innovation Center of Suzhou Nano Science  
and Technology, University of Science and Technology of China, Anhui Hefei 230026,  
China

<sup>b</sup>Key Laboratory of Energy Conversion Laboratory, Shanghai Institute of Ceramics,  
Chinese Academy of Sciences, Shanghai 200050, China

E-mail: [cchchen@ustc.edu.cn](mailto:cchchen@ustc.edu.cn)

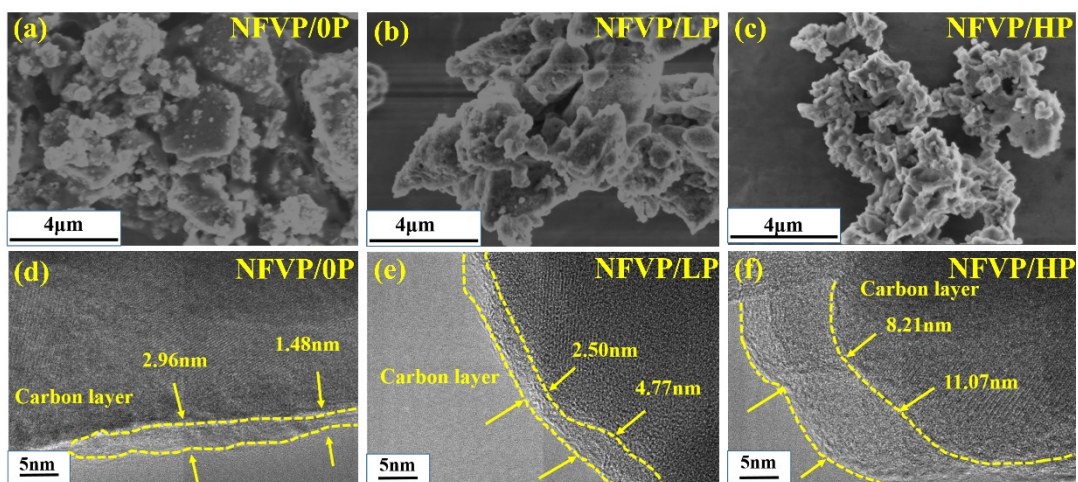

**Figure S1** SEM and HRTEM images of NFVP/0P (a, d), NFVP/LP (b, e) and NFVP/HP (c, f).

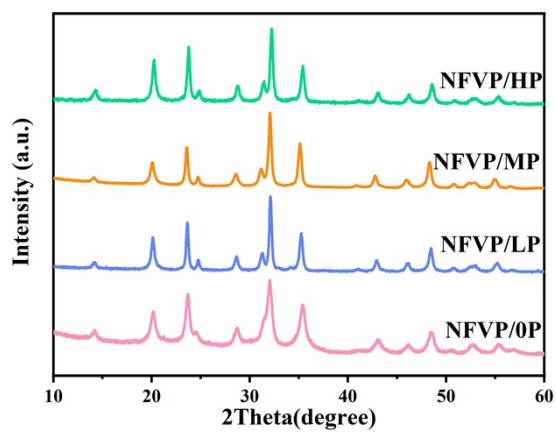

**Figure S2** XRD of NFVP with different carbon content.

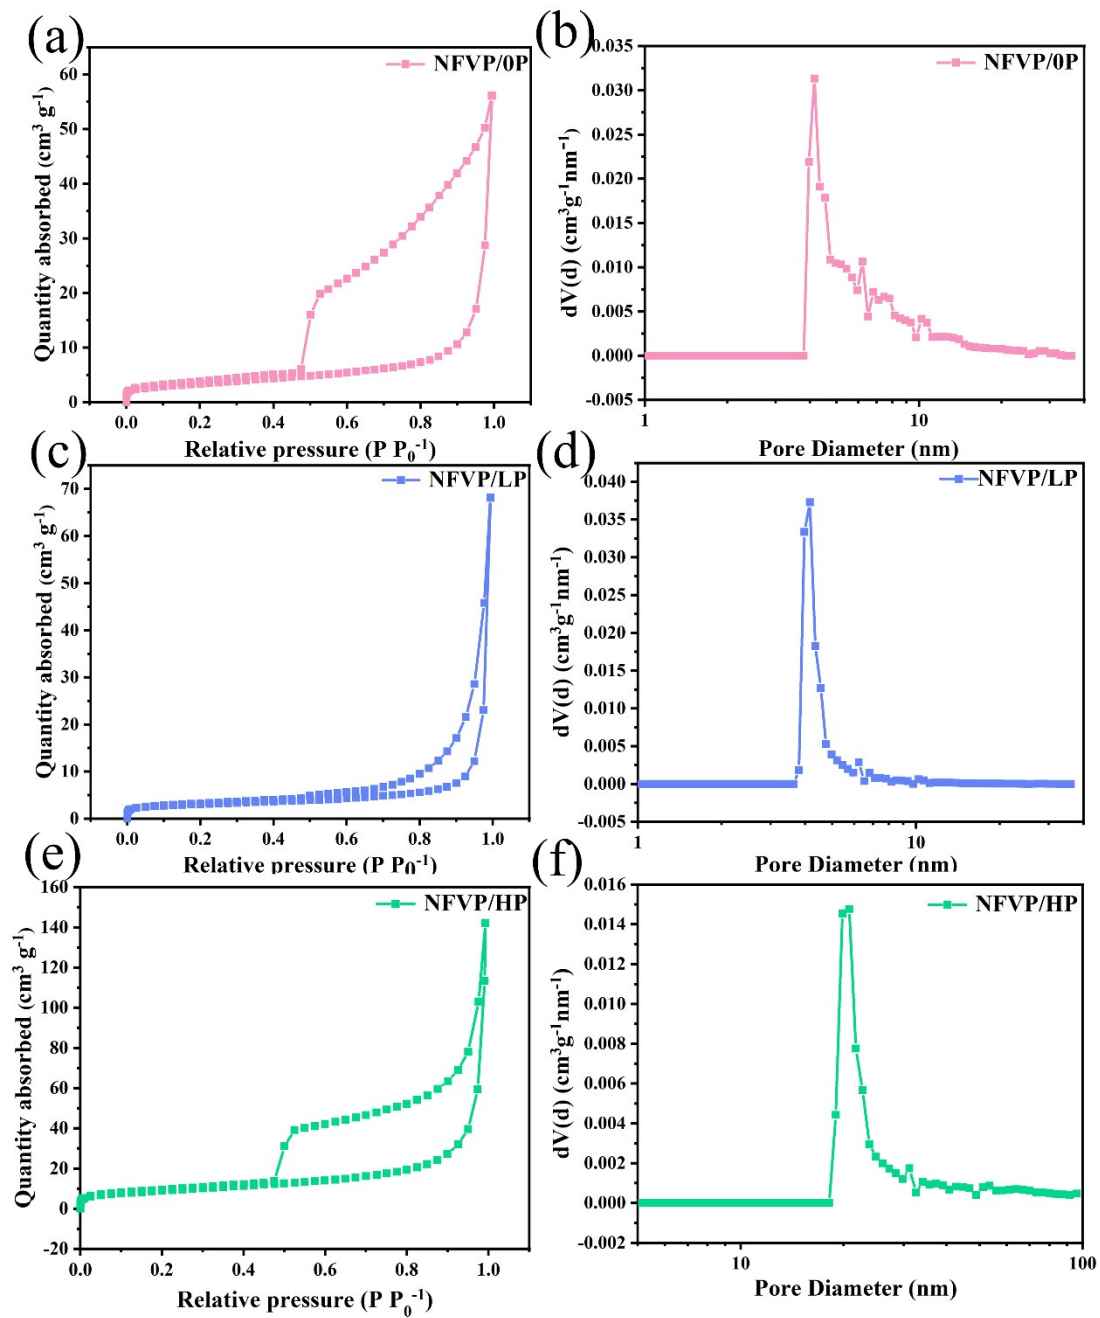

**Figure S3** Nitrogen adsorption/desorption isotherms of NFVP/0P (a), NFVP/LP (c), NFVP/HP (d) and pore size distribution of NFVP/0P (b), NFVP/LP (d), NFVP/HP (f).

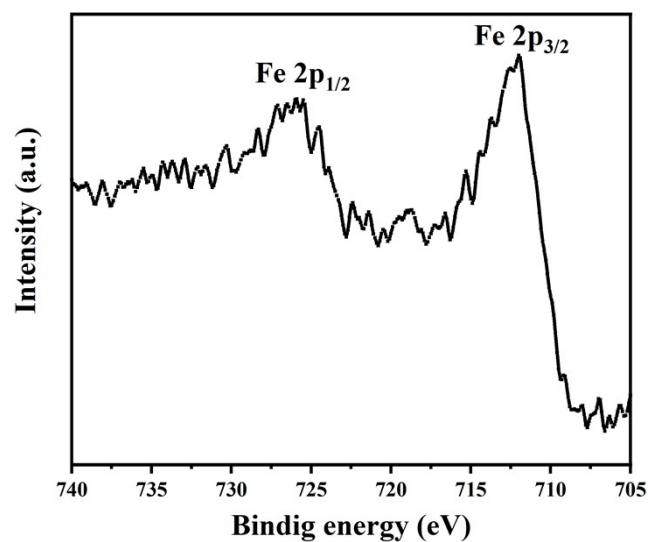

Figure S4 XPS survey spectrum of Fe 2p.

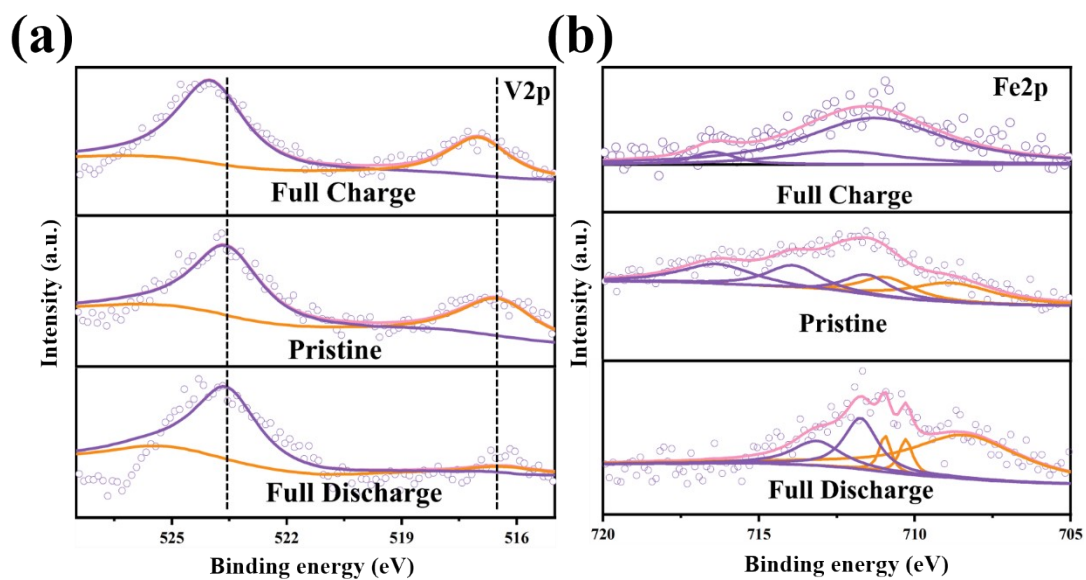

Fig. S5 V2p (a) and Fe2p (b) core levels for raw sample and fully charged and discharged electrodes.

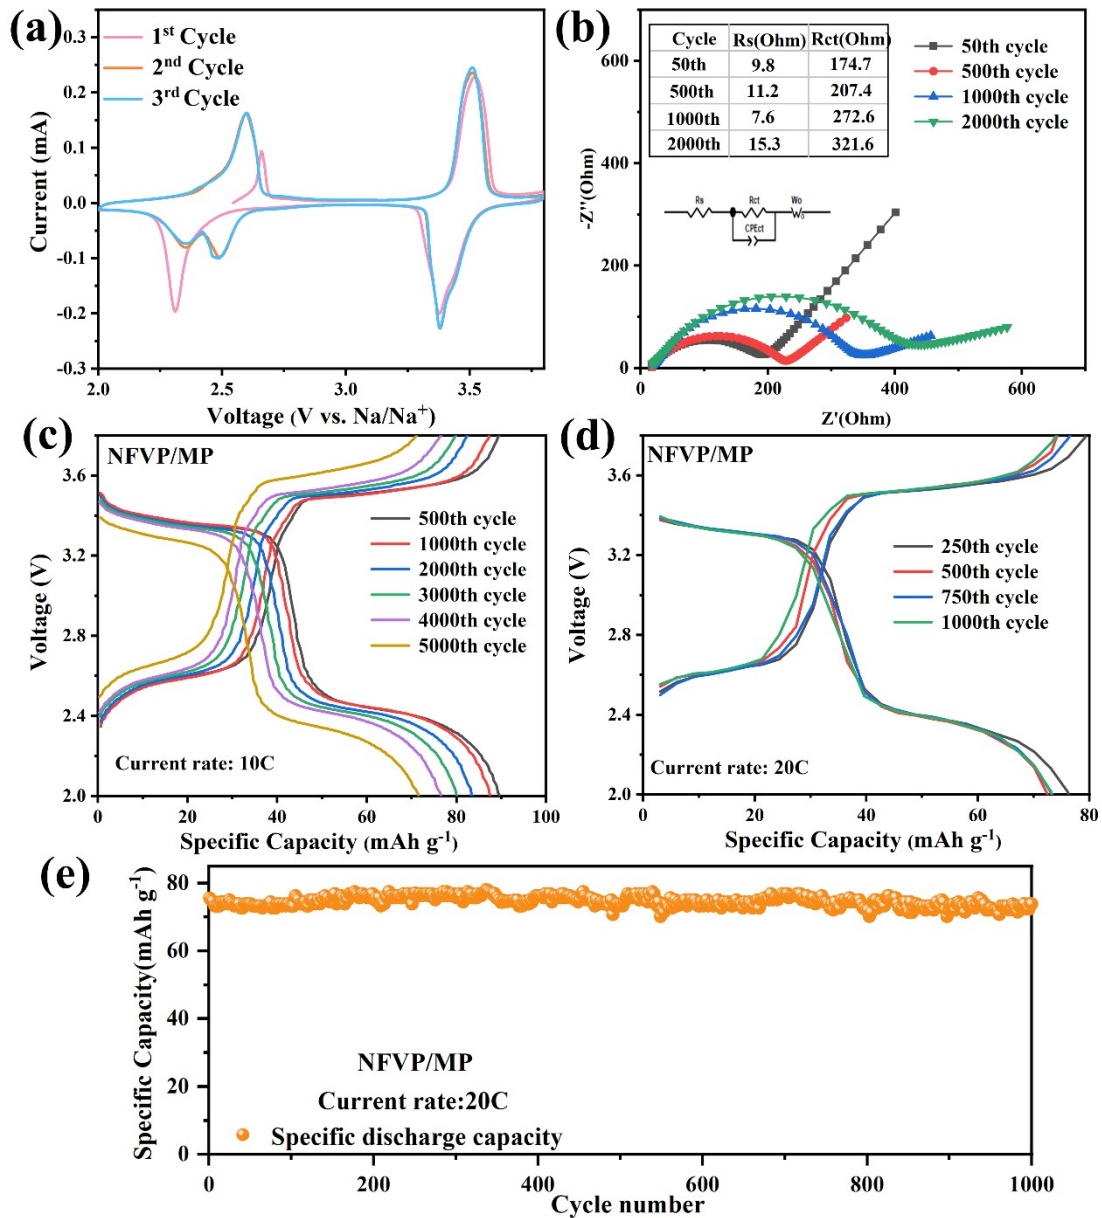

**Figure S6** The electrochemical performance of Na/NFVP half-cells: CV curves at 0.1 mV s<sup>-1</sup> (a), EIS spectra after different cycles (b), charge-discharge curves at different cycles at 10C (c) and 20C(d), cycling performance at 20C (e).

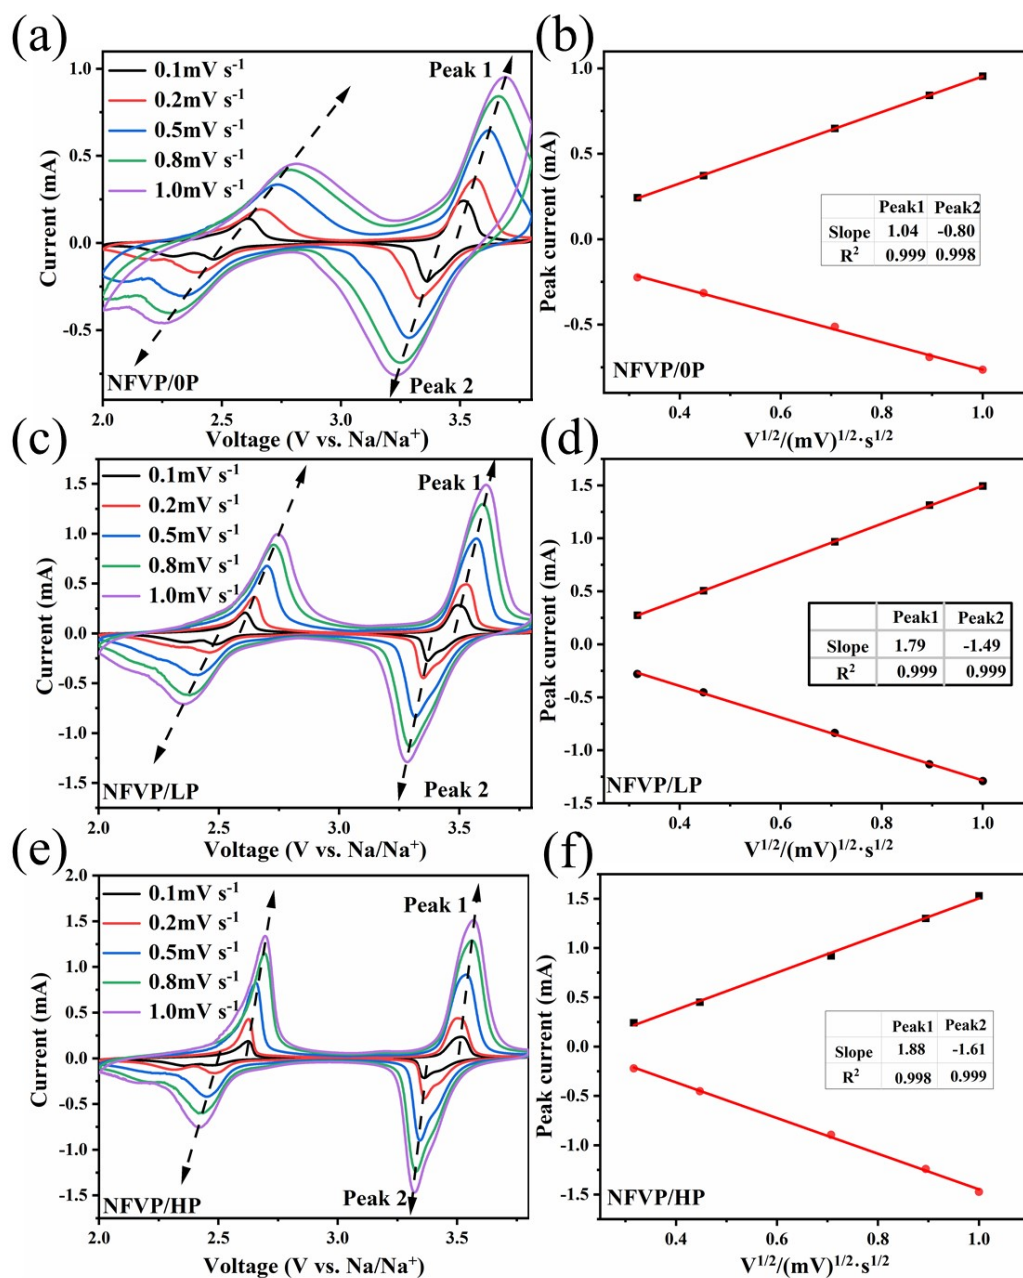

**Figure S7** CV curves of NFVP/OP, NFVP/LP and NFVP/HP at various sweep rates (a, c, e) and the relationships of NFVP/OP, NFVP/LP and NFVP/HP between the  $I_p$  and  $v^{1/2}$  (b, d, f).

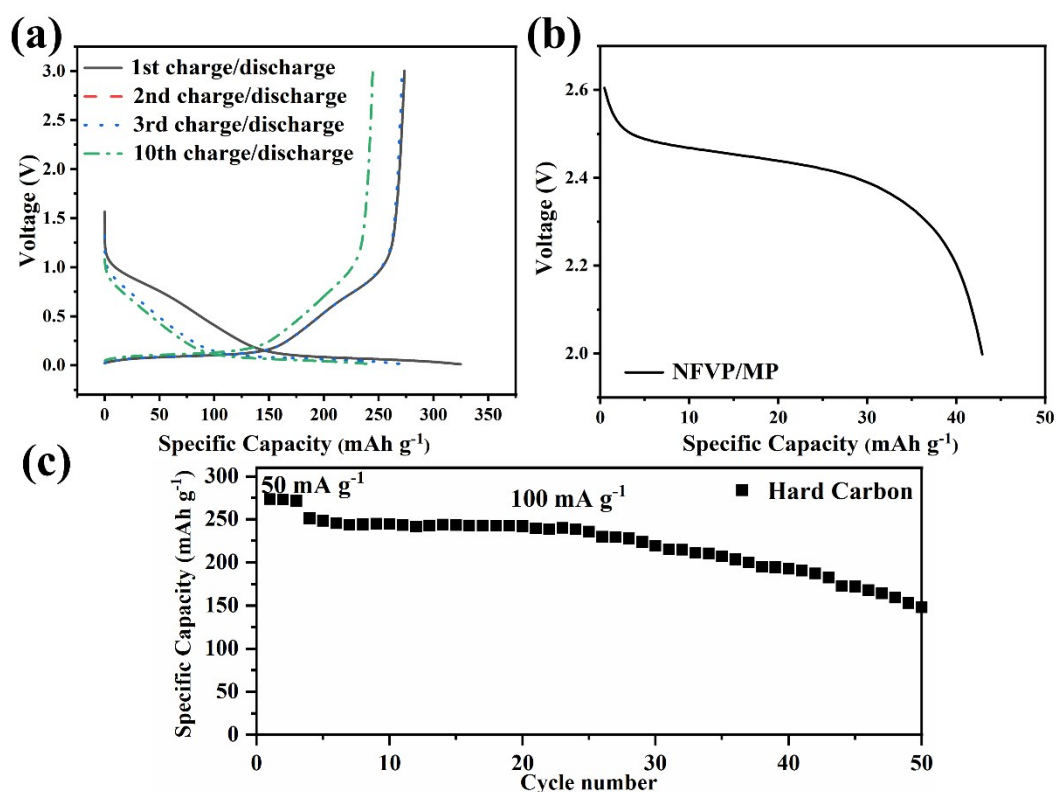

**Figure S8** The charge/discharge profiles (a) and cycling performance of HC (c), the discharge profile of NFVP/MP (b).

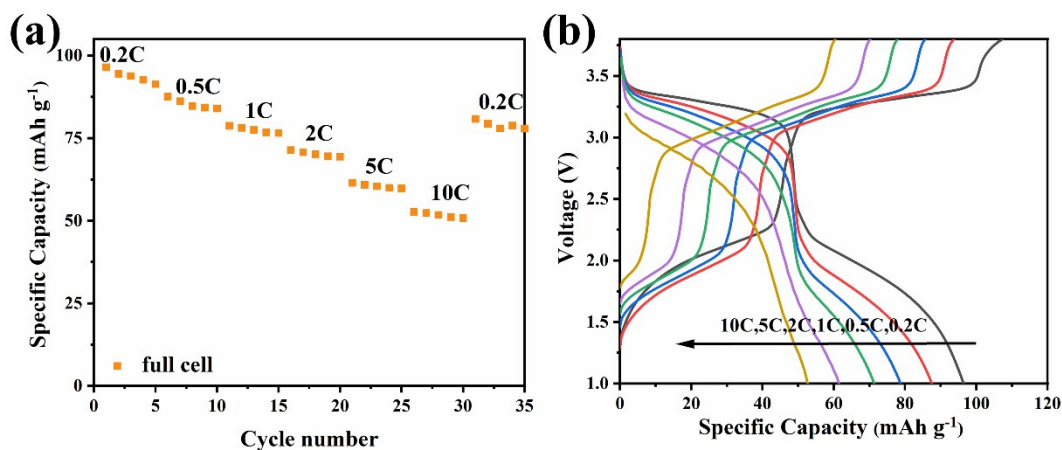

**Figure S9** The NFVP/MP//HC full cell : rate performance (a) and initial charge-discharge profiles at various rates (b).

**Table S1** The fitting parameter of Fe<sup>2+</sup> and Fe<sup>3+</sup> components in NFVP.

| NFVP             | Peak1 (eV) | Area (%) | Peak2 (eV) | Area (%) | Peak3 (eV) | Area (%) |
|------------------|------------|----------|------------|----------|------------|----------|
| Fe <sup>2+</sup> | 710.1      | 5.44     | 710.9      | 20.78    | -          | -        |
| Fe <sup>3+</sup> | 711.9      | 28.25    | 712.7      | 20.93    | 713.8      | 23.3     |
